# Supplementary material
Source: PubMed Central journal article supplement (PMC6637962)
Supplement: NIHMS1036595-supplement-Supplemental_Table_1-4.pdf [file NIHMS1036595-supplement-Supplemental_Table_1-4.pdf]

**Supplementary Table S1. *SMAD4* genotype per primary HNSCC determined by FISH**

| Primary HNSCC: <i>SMAD4</i> Genotype per Tumor by FISH |                    |                       |                        |                    |                       |
|--------------------------------------------------------|--------------------|-----------------------|------------------------|--------------------|-----------------------|
| <i>Primary HNSCC #</i>                                 | <i>SMAD4/CEN18</i> | <i>SMAD4 Genotype</i> | <i>Primary HNSCC #</i> | <i>SMAD4/CEN18</i> | <i>SMAD4 Genotype</i> |
| 1                                                      | 0.95               | Balanced              | 11                     | 0.99               | Balanced              |
| 2                                                      | 0.26               | Hemizygous Del        | 12                     | 1.03               | Balanced              |
| 3                                                      | 0.31               | Hemizygous Del        | 13                     | 1.23               | Gain                  |
| 4                                                      | 1.01               | Balanced              | 14                     | 1.10               | Balanced              |
| 5                                                      | 0.93               | Balanced              | 15                     | 0.51               | Hemizygous Del        |
| 6                                                      | 0.95               | Balanced              | 16                     | 0.65               | Hemizygous Del        |
| 7                                                      | 0.47               | Hemizygous Del        | 17                     | 0.76               | Hemizygous Del        |
| 8                                                      | 0.41               | Hemizygous Del        | 18                     | 0.84               | Balanced              |
| 9                                                      | 0.98               | Balanced              | 19                     | 1.00               | Balanced              |
| 10                                                     | 1.00               | Balanced              | 20                     | 0.96               | Balanced              |

**Supplementary Table S2. SMAD4 genotype per PDX tumor determined by FISH**

| PDX Tumor: SMAD4 Genotype per Tumor by FISH |                 |                   |         |                 |                   |         |                 |                   |
|---------------------------------------------|-----------------|-------------------|---------|-----------------|-------------------|---------|-----------------|-------------------|
| CUHN ID                                     | SMAD4/<br>CEN18 | SMAD4<br>Genotype | CUHN ID | SMAD4/<br>CEN18 | SMAD4<br>Genotype | CUHN ID | SMAD4/<br>CEN18 | SMAD4<br>Genotype |
| 002                                         | 0.49            | Hemizygous Del    | 040     | 0.75            | Hemizygous Del    | 076     | 0.81            | Balanced          |
| 004                                         | 0.51            | Hemizygous Del    | 042     | 1.03            | Balanced          | 079     | 0.98            | Balanced          |
| 007                                         | 0.55            | Hemizygous Del    | 043     | 0.53            | Hemizygous Del    | 086     | 1.04            | Balanced          |
| 011                                         | 0.58            | Hemizygous Del    | 044     | 1.03            | Balanced          | 088     | 0.96            | Balanced          |
| 013                                         | 0.47            | Hemizygous Del    | 047     | 1.01            | Balanced          | 092     | 0.00            | Homozygous Del    |
| 014                                         | 0.96            | Balanced          | 049     | 0.78            | Balanced          | 093     | 0.22            | Hemizygous Del    |
| 015                                         | 1.07            | Balanced          | 050     | 0.94            | Balanced          | 095     | 0.71            | Hemizygous Del    |
| 022                                         | 0.95            | Balanced          | 064     | 0.76            | Hemizygous Del    | 096     | 1.00            | Balanced          |
| 025                                         | 0.24            | Hemizygous Del    | 065     | 0.00            | Homozygous Del    | 097     | 0.99            | Balanced          |
| 026                                         | 1.11            | Balanced          | 067     | 0.91            | Balanced          | 098     | 0.99            | Balanced          |
| 027                                         | 0.93            | Balanced          | 068     | 1.03            | Balanced          | 103     | 0.67            | Hemizygous Del    |
| 029                                         | 0.69            | Hemizygous Del    | 069     | 0.93            | Balanced          | 108     | 1.00            | Balanced          |
| 032                                         | 0.94            | Balanced          | 070     | 0.94            | Balanced          | 109     | 0.45            | Hemizygous Del    |
| 033                                         | 0.40            | Hemizygous Del    | 071     | 1.09            | Balanced          | 111     | 0.46            | Hemizygous Del    |
| 035                                         | 1.09            | Balanced          | 072     | 0.47            | Hemizygous Del    |         |                 |                   |
| 036                                         | 0.57            | Hemizygous Del    | 072-2   | 0.34            | Hemizygous Del    |         |                 |                   |

**Supplementary Table S3. *SMAD4* and *CEN18* copy number per primary HNSCC determined by FISH**

| Primary HNSCC: <i>SMAD4</i> and <i>CEN18</i> Copy Number per Tumor |                    |              |                    |              |                        |                    |              |                    |              |
|--------------------------------------------------------------------|--------------------|--------------|--------------------|--------------|------------------------|--------------------|--------------|--------------------|--------------|
| <i>Primary HNSCC #</i>                                             | <i>Copy Number</i> | <i>SMAD4</i> | <i>Copy Number</i> | <i>CEN18</i> | <i>Primary HNSCC #</i> | <i>Copy Number</i> | <i>SMAD4</i> | <i>Copy Number</i> | <i>CEN18</i> |
| 1                                                                  | 2.82               | Polysomy     | 2.98               | Polysomy     | 11                     | 1.52               | Disomy       | 1.54               | Disomy       |
| 2                                                                  | 1.40               | Monosomy     | 5.38               | Polysomy     | 12                     | 1.98               | Disomy       | 1.92               | Disomy       |
| 3                                                                  | 1.66               | Disomy       | 5.38               | Polysomy     | 13                     | 3.16               | Polysomy     | 2.56               | Polysomy     |
| 4                                                                  | 1.92               | Disomy       | 1.90               | Disomy       | 14                     | 3.38               | Polysomy     | 3.06               | Polysomy     |
| 5                                                                  | 3.48               | Polysomy     | 3.76               | Polysomy     | 15                     | 1.04               | Monosomy     | 2.04               | Disomy       |
| 6                                                                  | 1.76               | Disomy       | 1.86               | Disomy       | 16                     | 1.40               | Monosomy     | 2.14               | Disomy       |
| 7                                                                  | 1.04               | Monosomy     | 2.22               | Disomy       | 17                     | 1.73               | Disomy       | 2.27               | Disomy       |
| 8                                                                  | 1.18               | Monosomy     | 2.90               | Polysomy     | 18                     | 2.14               | Disomy       | 2.54               | Polysomy     |
| 9                                                                  | 1.90               | Disomy       | 1.94               | Disomy       | 19                     | 1.92               | Disomy       | 1.92               | Disomy       |
| 10                                                                 | 1.92               | Disomy       | 1.92               | Disomy       | 20                     | 2.66               | Polysomy     | 2.78               | Polysomy     |

**Supplementary Table S4. *SMAD4* and *CEN18* copy number per PDX tumor determined by FISH**

| PDX Tumor: <i>SMAD4</i> and <i>CEN18</i> Copy Number per Tumor |             |              |             |              |                |             |              |             |              |
|----------------------------------------------------------------|-------------|--------------|-------------|--------------|----------------|-------------|--------------|-------------|--------------|
| <i>CUHN ID</i>                                                 | Copy Number | <i>SMAD4</i> | Copy Number | <i>CEN18</i> | <i>CUHN ID</i> | Copy Number | <i>SMAD4</i> | Copy Number | <i>CEN18</i> |
| 002                                                            | 0.98        | Monosomy     | 2.02        | Disomy       | 064            | 1.94        | Disomy       | 2.54        | Polysomy     |
| 004                                                            | 1.24        | Monosomy     | 2.44        | Disomy       | 065            | 0.00        | Nullisomy    | 2.10        | Disomy       |
| 007                                                            | 1.62        | Disomy       | 2.92        | Polysomy     | 067            | 1.62        | Disomy       | 1.78        | Disomy       |
| 011                                                            | 1.58        | Disomy       | 2.72        | Polysomy     | 068            | 2.14        | Disomy       | 2.08        | Disomy       |
| 013                                                            | 1.54        | Disomy       | 3.28        | Polysomy     | 069            | 3.40        | Polysomy     | 3.64        | Polysomy     |
| 014                                                            | 1.78        | Disomy       | 1.86        | Disomy       | 070            | 1.66        | Disomy       | 1.76        | Disomy       |
| 015                                                            | 2.14        | Disomy       | 2.00        | Disomy       | 071            | 2.34        | Disomy       | 2.14        | Disomy       |
| 022                                                            | 1.66        | Disomy       | 1.74        | Disomy       | 072            | 1.04        | Monosomy     | 2.22        | Disomy       |
| 025                                                            | 1.14        | Monosomy     | 4.80        | Polysomy     | 072-2          | 1.12        | Monosomy     | 3.26        | Polysomy     |
| 026                                                            | 3.10        | Polysomy     | 2.80        | Polysomy     | 076            | 2.26        | Disomy       | 2.78        | Polysomy     |
| 027                                                            | 0.84        | Monosomy     | 0.90        | Monosomy     | 079            | 2.56        | Polysomy     | 2.60        | Polysomy     |
| 029                                                            | 1.50        | Monosomy     | 2.16        | Disomy       | 086            | 2.74        | Polysomy     | 2.64        | Polysomy     |
| 032                                                            | 1.86        | Disomy       | 1.98        | Disomy       | 088            | 2.40        | Disomy       | 2.50        | Disomy       |
| 033                                                            | 0.98        | Monosomy     | 2.46        | Disomy       | 092            | 0.00        | Nullisomy    | 1.66        | Disomy       |
| 035                                                            | 2.16        | Disomy       | 1.98        | Disomy       | 093            | 0.86        | Monosomy     | 3.94        | Polysomy     |
| 036                                                            | 1.36        | Monosomy     | 2.38        | Disomy       | 095            | 1.66        | Disomy       | 2.34        | Disomy       |
| 040                                                            | 2.36        | Disomy       | 3.16        | Polysomy     | 096            | 1.82        | Disomy       | 1.82        | Disomy       |
| 042                                                            | 1.86        | Disomy       | 1.80        | Disomy       | 097            | 1.70        | Disomy       | 1.72        | Disomy       |
| 043                                                            | 1.34        | Monosomy     | 2.52        | Polysomy     | 098            | 2.30        | Disomy       | 2.32        | Disomy       |
| 044                                                            | 2.82        | Polysomy     | 2.74        | Polysomy     | 103            | 1.50        | Monosomy     | 2.23        | Disomy       |
| 047                                                            | 1.80        | Disomy       | 1.78        | Disomy       | 108            | 2.34        | Disomy       | 2.34        | Disomy       |
| 049                                                            | 1.58        | Disomy       | 2.03        | Disomy       | 109            | 1.32        | Monosomy     | 2.94        | Polysomy     |
| 050                                                            | 1.96        | Disomy       | 2.08        | Disomy       | 111            | 2.36        | Disomy       | 5.12        | Polysomy     |
